# Supplementary material
Source: PubMed Central journal article supplement (PMC3290692)
Supplement: NIHMS86479-supplement-1_si_001.pdf [file NIHMS86479-supplement-1_si_001.pdf]

**Supporting Information**  
**for**  
**Photo-excitation of adenine cation radical [A<sup>•+</sup>] in the near**  
**UV-vis region produces sugar radicals in Adenosine and in its**  
**nucleotides**

By

Amitava Adhikary, Anil Kumar, Deepti Khanduri, and Michael D. Sevilla\*

Department of Chemistry  
Oakland University  
Rochester, MI 48309

\*Author for correspondence.

**Figure S1**  
**Figure S2**  
**Figure S3**  
**Figure S4**  
**Figure S5**  
**Figure S6**  
**Table T1**

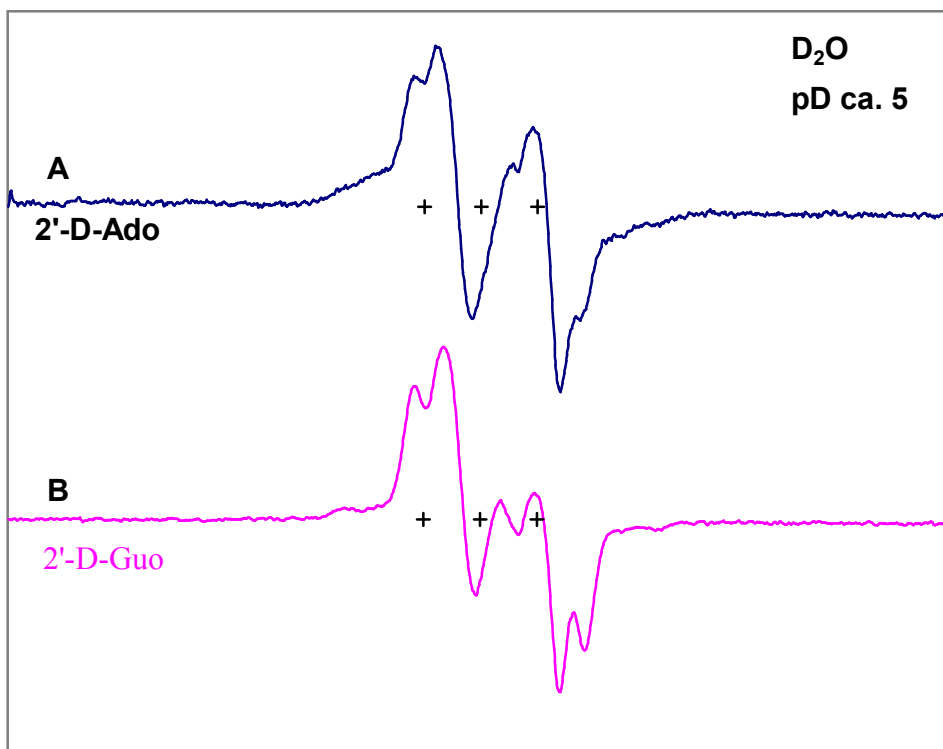

**Figure S1.** Spectra after visible illumination at 143 K of (A)  $A\cdot^+$  in 2'-D-Ado, and (B) of  $G\cdot^+$  in 2'-D-Guo (Ref. 8) in 7.5 M LiCl glass/D<sub>2</sub>O in the presence of K<sub>2</sub>S<sub>2</sub>O<sub>8</sub> as an electron scavenger. The central doublet from C5'• is present in both spectra, but the end lines of the quartet belonging to C3'• are lost. The three calibration marks are separated by 26.18 G from 1<sup>st</sup> to 3<sup>rd</sup> mark. The center mark is at  $g=2.0056$ .

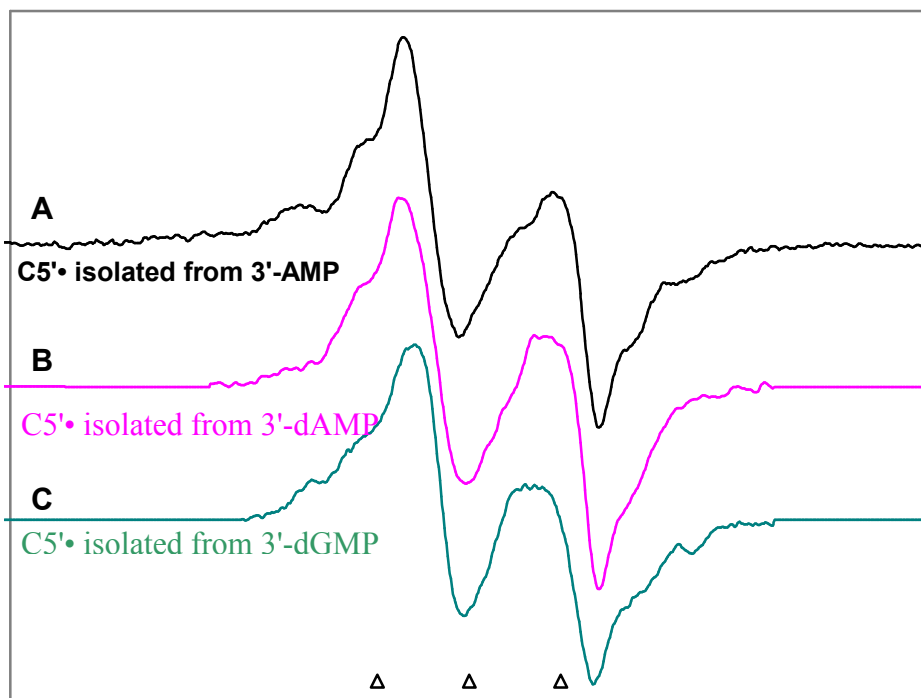

**Figure S2.** ESR spectra of C5'• isolated from RNA- and DNA- nucleotides. Spectrum (A) C5'• formed via photo-excitation of A•<sup>+</sup> in glassy (7.5 M LiCl/D<sub>2</sub>O) sample of 3'-AMP at pD *ca.* 6. Spectra (B) and (C) are the C5'• obtained from glassy (7 M LiCl/D<sub>2</sub>O) samples of 3'-dAMP (Ref. 9) and 3'-dGMP (Ref. 2) respectively. The hyperfine couplings, total hyperfine splitting, line-shape and g-value of all these three spectra are nearly identical.

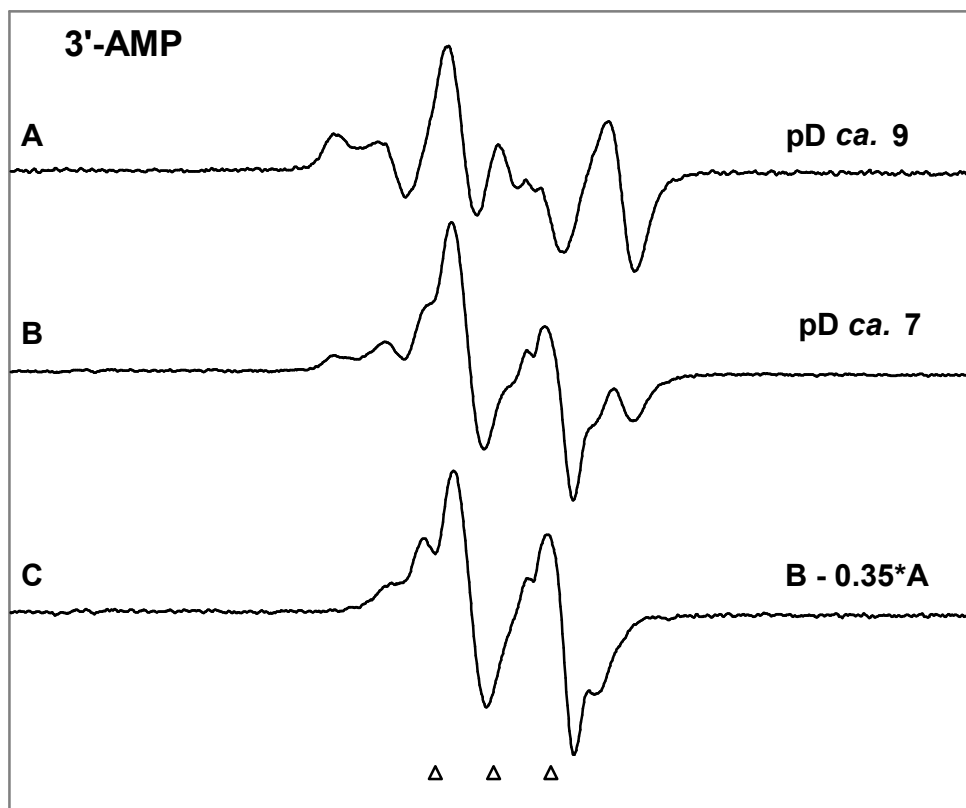

**Figure S3.** Spectrum (A) is the  $C5'\cdot$  formed via photo-excitation of one-electron oxidized adenine in glassy (7.5 M LiCl/D<sub>2</sub>O) sample of 3'-AMP at pD *ca.* 9. This spectrum is assigned to  $C5'\cdot$  in 3'-AMP with the charge of the phosphate =-2. Spectrum (B) is the  $C5'\cdot$  formed via photo-excitation of  $A\cdot^+$  in glassy (7.5 M LiCl/D<sub>2</sub>O) sample of 3'-AMP at pD *ca.* 7. Spectrum (C) shows that in spectrum (B) 35% of spectrum (A) is present.

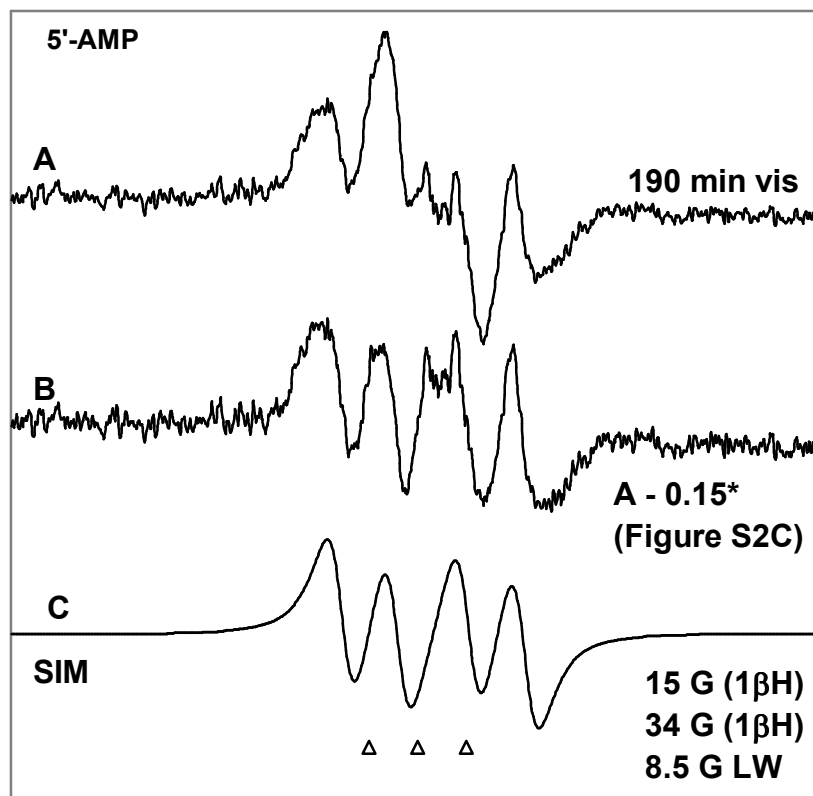

**Figure S4.** Spectrum (A) represents the sugar radical cohort comprising of  $C3'\cdot$  (ca. 85%), and  $C5'\cdot$  (ca. 15%) found in glassy (7.5 M LiCl/D<sub>2</sub>O) samples of 5'-AMP via photo-excitation of  $A\cdot^+$  followed by subtraction of the remaining ca. 13% of the  $A\cdot^+$  spectrum shown in Figure 1A. Spectrum (B) shows the isolation of the quartet owing to careful subtraction of the central doublet (ca. 15%) shown in Figure S2C from spectrum A. Spectrum (C) is the isotropic simulation of the quartet with the parameters: 34 G (1βH), 15G (1βH), 8.5G line-width,  $g(\text{center}) = 2.0027$ .

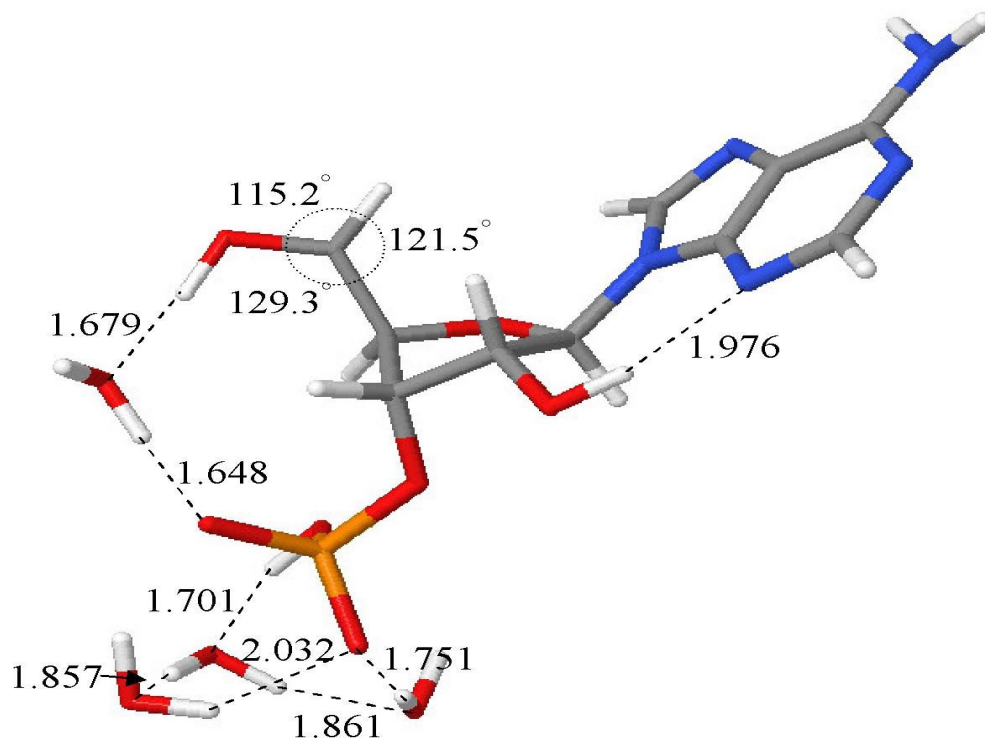

**Figure S5.** B3LYP/6-31G\* optimized geometries of C5'-radical in  $\text{PO}_4\text{H}^{-1}$  in the presence of 4 waters. The atoms O5', C5', H5', and C4' are constrained in the same plane.

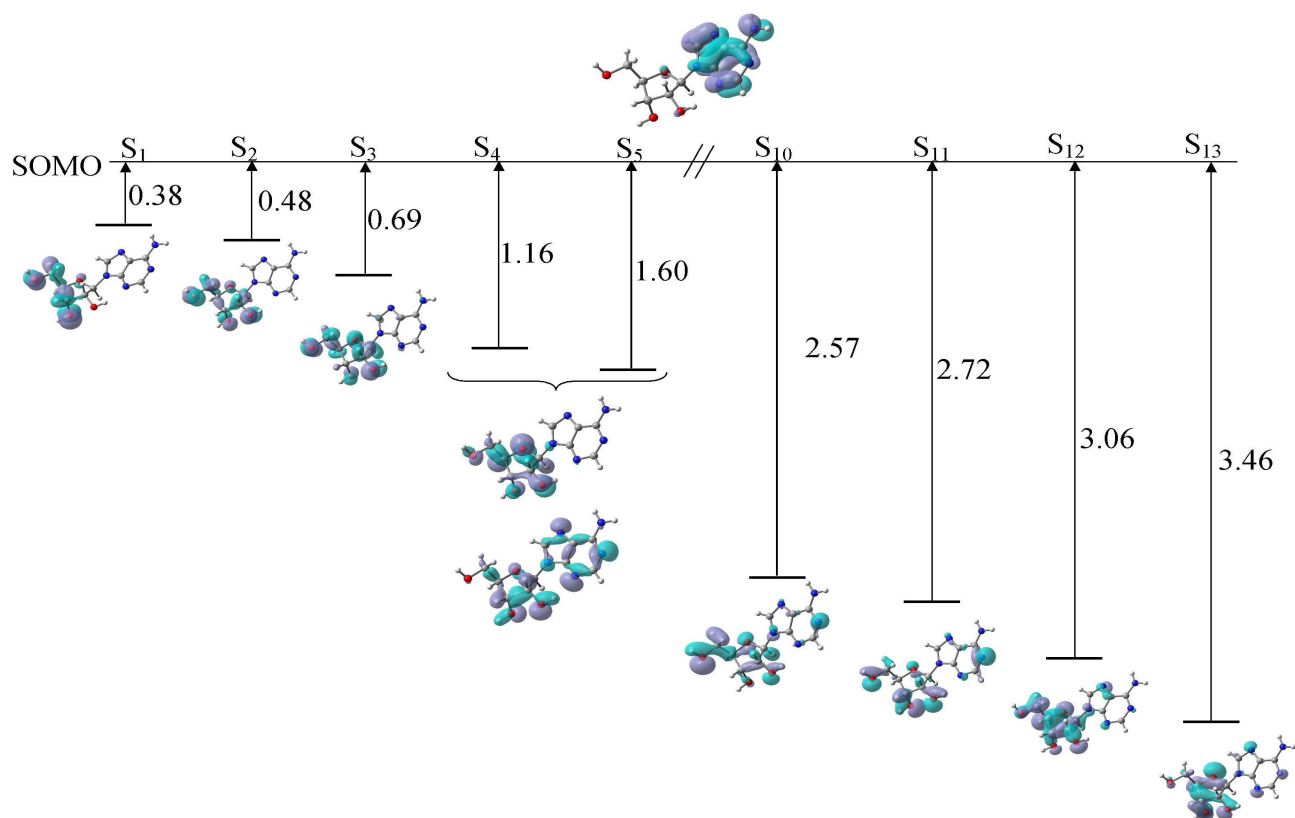

**Figure S6.** TD-B3LYP/6-31G(d) calculated electronic transitions from inner core molecular orbitals to 70  $\beta$  SOMO (singly occupied molecular orbital) in Ado cation radical.

**Table T1**  
**TD-DFT 6-31/G(d) Calculation for Adenosine cation radical**  
**(Structure Optimized at DFT B3LYP 6-31G\*)**  
**Method: TD-DFT**  
**Basis Set: 6-31G(d)**  
**Functionals: B3LYP**  
**Transitions: 13**

|                                                                                   |        |         |           |            |          |
|-----------------------------------------------------------------------------------|--------|---------|-----------|------------|----------|
| Excited State                                                                     | 1:     | Spin -A | 0.3779 eV | 3280.81 nm | f=0.0006 |
|                                                                                   | 68B -> | 70B     | 0.28478   |            |          |
|                                                                                   | 69B -> | 70B     | 0.94606   |            |          |
| This state for optimization and/or second-order correction.                       |        |         |           |            |          |
| Copying the excited state density for this state as the 1-particle RhoCI density. |        |         |           |            |          |
| Excited State                                                                     | 2:     | Spin -A | 0.4839 eV | 2562.21 nm | f=0.0081 |
|                                                                                   | 67B -> | 70B     | 0.37271   |            |          |
|                                                                                   | 68B -> | 70B     | 0.82429   |            |          |
|                                                                                   | 69B -> | 70B     | -0.27057  |            |          |
| Excited State                                                                     | 3:     | Spin -A | 0.6937 eV | 1787.35 nm | f=0.0060 |
|                                                                                   | 67B -> | 70B     | 0.86869   |            |          |
|                                                                                   | 68B -> | 70B     | -0.44240  |            |          |
| Excited State                                                                     | 4:     | Spin -A | 1.1605 eV | 1068.36 nm | f=0.0019 |
|                                                                                   | 64B -> | 70B     | -0.38883  |            |          |
|                                                                                   | 65B -> | 70B     | -0.57383  |            |          |
|                                                                                   | 66B -> | 70B     | 0.70734   |            |          |
|                                                                                   | 67B -> | 70B     | 0.10613   |            |          |
| Excited State                                                                     | 5:     | Spin -A | 1.2785 eV | 969.73 nm  | f=0.0083 |
|                                                                                   | 64B -> | 70B     | 0.41515   |            |          |
|                                                                                   | 65B -> | 70B     | 0.57271   |            |          |
|                                                                                   | 66B -> | 70B     | 0.68575   |            |          |
| Excited State                                                                     | 6:     | Spin -A | 1.6919 eV | 732.83 nm  | f=0.0014 |
|                                                                                   | 60B -> | 70B     | -0.18752  |            |          |
|                                                                                   | 62B -> | 70B     | -0.11232  |            |          |
|                                                                                   | 63B -> | 70B     | 0.62738   |            |          |
|                                                                                   | 64B -> | 70B     | 0.62665   |            |          |
|                                                                                   | 65B -> | 70B     | -0.42332  |            |          |
| Excited State                                                                     | 7:     | Spin -A | 2.0217 eV | 613.26 nm  | f=0.0141 |
|                                                                                   | 59B -> | 70B     | -0.33712  |            |          |
|                                                                                   | 61B -> | 70B     | -0.33321  |            |          |
|                                                                                   | 62B -> | 70B     | -0.39537  |            |          |
|                                                                                   | 63B -> | 70B     | 0.58250   |            |          |
|                                                                                   | 64B -> | 70B     | -0.43155  |            |          |
|                                                                                   | 65B -> | 70B     | 0.28723   |            |          |
| Excited State                                                                     | 8:     | Spin -A | 2.1608 eV | 573.80 nm  | f=0.0099 |
|                                                                                   | 59B -> | 70B     | 0.71644   |            |          |
|                                                                                   | 60B -> | 70B     | 0.25932   |            |          |
|                                                                                   | 61B -> | 70B     | 0.30289   |            |          |



|                   |          |           |           |          |
|-------------------|----------|-----------|-----------|----------|
| 62B -> 70B        | 0.17837  |           |           |          |
| 63B -> 70B        | 0.42237  |           |           |          |
| 64B -> 70B        | -0.22039 |           |           |          |
| 65B -> 70B        | 0.23896  |           |           |          |
| Excited State 9:  | Spin -A  | 2.3964 eV | 517.38 nm | f=0.0173 |
| 66A -> 71A        | -0.10525 |           |           |          |
| 67A -> 71A        | 0.12793  |           |           |          |
| 59B -> 70B        | -0.31049 |           |           |          |
| 60B -> 70B        | 0.88293  |           |           |          |
| 62B -> 70B        | 0.12131  |           |           |          |
| 64B -> 70B        | 0.13464  |           |           |          |
| 65B -> 70B        | -0.15332 |           |           |          |
| Excited State 10: | Spin -A  | 2.5743 eV | 481.62 nm | f=0.0012 |
| 59B -> 70B        | -0.42523 |           |           |          |
| 60B -> 70B        | -0.23533 |           |           |          |
| 61B -> 70B        | 0.25107  |           |           |          |
| 62B -> 70B        | 0.76395  |           |           |          |
| 63B -> 70B        | 0.28287  |           |           |          |
| 64B -> 70B        | -0.17322 |           |           |          |
| Excited State 11: | Spin -A  | 2.7176 eV | 456.23 nm | f=0.0007 |
| 56B -> 70B        | -0.22676 |           |           |          |
| 59B -> 70B        | -0.24155 |           |           |          |
| 61B -> 70B        | 0.82944  |           |           |          |
| 62B -> 70B        | -0.43209 |           |           |          |
| Excited State 12: | Spin -A  | 3.0578 eV | 405.47 nm | f=0.0003 |
| 56B -> 70B        | 0.80276  |           |           |          |
| 57B -> 70B        | -0.21789 |           |           |          |
| 58B -> 70B        | 0.47353  |           |           |          |
| 59B -> 70B        | -0.11957 |           |           |          |
| 61B -> 70B        | 0.19459  |           |           |          |
| Excited State 13: | Spin -A  | 3.4545 eV | 358.91 nm | f=0.0004 |
| 56B -> 70B        | -0.48916 |           |           |          |
| 58B -> 70B        | 0.86210  |           |           |          |

Complete reference of the reference no. 31a in the text:

31a. Frisch, M. J.; Trucks, G. W.; Schlegel, H. B.; Scuseria, G. E.; Robb, M.A.; Cheeseman, J. R.; Montgomery, J. A., Jr.; Vreven, T.; Kudin, K. N.;Burant, J. C.; Millam, J. M.; Iyengar, S. S.; Tomasi, J.; Barone, V.;Mennucci, B.; Cossi, M.; Scalmani, G.; Rega, N.; Petersson, G. A.;Nakatsuji, H.; Hada, M.; Ehara, M.; Toyota, K.; Fukuda, R.; Hasegawa, J.;Ishida, M.; Nakajima, T.; Honda, Y.; Kitao, O.; Nakai, H.; Klene, M.; Li,X.; Knox, J. E.; Hratchian, H. P.; Cross, J. B.; Adamo, C.; Jaramillo, J.;Gomperts, R.; Stratmann, R. E.; Yazyev, O.; Austin, A. J.; Cammi, R.;Pomelli, C.; Ochterski, J. W.; Ayala, P. Y.; Morokuma, K.; Voth, G. A.;Salvador, P.; Dannenberg, J. J.; Zakrzewski, V. G.; Dapprich, S.; Daniels,A. D.; Strain, M. C.; Farkas, O.; Malick, D. K.; Rabuck, A. D.;Raghavachari, K.; Foresman, J. B.; Ortiz, J. V.; Cui, Q.; Baboul, A. G.;Clifford, S.; Cioslowski, J.; Stefanov, B. B.; Liu, G.; Liashenko, A.;Piskorz, P.; Komaromi, I.; Martin, R. L.; Fox, D. J.; Keith, T.; Al-Laham, M. A.; Peng, C. Y.; Nanayakkara, A.; Challacombe, M.; Gill, P. M. W.;Johnson, B.; Chen, W.; Wong, M. W.; Gonzalez, C.; Pople, J. A. Gaussian03, Revision B.04; Gaussian, Inc.: Pittsburgh, PA, 2003.
